# Supplementary material for: Hematological and Hemodynamic Responses to Acute and Short-Term Creatine Nitrate Supplementation
Source: Nutrients. 2017 Dec 15;9(12):1359. doi: 10.3390/nu9121359 (PMC5748809; doi:10.3390/nu9121359)
Supplement: Supplementary file 1 [file nutrients-09-01359-s001.xlsx]

## Sheet: Supplement Table 1
	Table S1: Hemodynamic Response
			Day
		Treatment	0 Pre Supine	0 Pre Vertical	0 Post Supine	0 Post Vertical	5 Pre Supine	5 Pre Vertical	5 Post Supine	5 Post Vertical	Mean	Interaction		p-Level
	Systolic	Overall	113.3±8.2	113.9±9.8	113.8±8.3	114.1±10.1	114.0±8.1	114.2±9.4	113.7±9.1	113.8±10.0	113.9±9.1	Time		0.92
	Blood	PLA	113.9±10.2	114.4±11.2	114.2±8.9	115.0±10.0	113.6±8.5	114.9±10.3	112.2±10.3	112.7±9.0	114.4±10.1	Treatment		0.78
	Pressure	CNL	114.9±7.1	114.4±10.0	113.1±7.2	113.6±9.6	115.5±7.9	115.7±8.9	115.1±8.3	115.2±10.6	114.7±8.7	Treatment x Time		0.93
	(mm Hg)	CNH	111.2±6.7	112.9±8.2	114.1±8.9	113.8±11.0	113.0±7.8	111.9±8.8	113.9±8.8	113.4±10.4	113.0±8.8
		Male	114.7±7.7	115.6±9.7	114.2±7.6	115.5±8.8	114.6±8.0	115.9±8.3	112.6±7.4	113.9±9.8	114.6±8.5	gender		0.12
		Female	110.7±8.6†	110.7±9.2†	113.1±9.6	111.7±11.8	113.0±8.2	111.1±10.5†	115.9±11.5*	113.6±10.4	112.5±10.0	Time x Gender		0.02
		PLA M	116.7±8.9	117.0±10.6	114.9±8.7	116.6±10.0	115.1±8.7	117.2±9.5	109.4±7.0	110.9±8.0	114.7±9.2	Treatment x Gender		0.56
		PLA F	108.8±11.0	109.6±11.1	112.8±9.6	112.2±9.8	110.8±7.7	110.6±10.8	117.2±13.4	116.0±10.1	112.3±10.5	T x T x G		0.23
		CNL M	116.7±6.9	116.6±10.3	114.1±7.4	114.9±8.7	116.9±7.6	117.6±7.4	114.6±5.4	117.0±10.1	116.0±8.0
		CNL F	111.6±6.5	110.4±8.4	111.4±6.8	111.4±11.2	113.0±8.2	112.4±10.6	116.2±12.3	112.0±11.4	112.3±9.3
		CNH M	110.9±6.0	113.2±8.2	113.4±6.8	115.1±8.0	111.8±7.2	112.8±7.4	113.7±8.6	113.7±10.8	113.1±7.9
		CNH F	111.8±8.2	112.2±8.6	115.2±12.2	111.4±15.1	115.2±8.9	110.4±11.2	114.2±9.5	112.8±10.3	112.9±10.4
	Diastolic	Overall	72.7±8.5	75.5±8.9*	73.5±7.9	76.7±7.8*	73.5±8.7	76.6±10.1*	73.7±8.5	76.2±7.7*	74.8±8.6	Time		0.001
	Blood	PLA	72.6±9.1	76.8±8.8	74.5±7.6	77.9±7.6	74.5±9.2	76.2±9.7	74.1±8.8	76.1±6.4	75.4±8.5	Treatment		0.78
	Pressure	CNL	73.9±7.1	74.8±8.0	72.8±7.0	76.1±7.0	73.9±9.0	77.4±11.3	72.3±7.9	76.4±8.5	74.7±8.4	Treatment x Time		0.88
	(mm Hg)	CNH	71.6±9.2	74.9±10.0	73.1±9.2	76.1±8.9	72.1±8.0	76.0±9.5	74.6±8.8	76.0±8.4	74.3±9.0
		Male	74.0±7.5	77.2±6.8	73.8±6.5	76.5±5.9	74.6±7.4	77.6±7.3	73.2±6.1	76.0±6.4	75.4±6.9	Gender		0.25
		Female	70.3±9.7	72.5±11.3	72.9±10.1	77.1±10.5	71.5±10.5	74.7±13.8	74.5±11.7	76.5±9.8	73.7±11.1	Time x Gender		0.051
		PLA M	74.1±9.5	78.9±8.1	74.7±7.0	76.9±6.6	76.7±6.5	76.8±7.1	72.9±6.0	74.9±4.4	75.7±7.1	Treatment x Gender		0.95
		PLA F	70.0±8.1	73.0±9.0	74.2±9.0	79.8±9.2	70.6±12.3	75.2±13.7	76.4±12.5	78.4±8.7	74.7±10.5	T x T x G		0.69
		CNL M	74.7±6.4	75.9±6.3	73.7±5.9	76.6±6.0	74.9±8.8	78.7±7.4	71.6±5.6	76.9±7.0	75.4±6.9
		CNL F	72.4±8.4	72.8±10.5	71.2±8.9	75.4±8.7	72.2±9.7	75.2±16.5	73.6±11.3	75.6±11.0	73.6±10.5
		CNH M	73.3±6.5	76.8±5.8	73.0±6.8	76.1±5.3	72.3±6.6	77.3±7.6	75.2±6.4	76.2±7.5	75.0±6.7
		CNH F	68.6±12.6	71.6±14.7	73.2±12.8	76.0±13.6	71.8±10.6	73.6±12.3	73.4±12.4	75.6±10.3	73.0±12.1
	Mean	Overall	99.8±7.4	101.1±8.6	100.3±7.5	101.7±8.4	100.5±7.3	101.6±8.9	100.4±8.0	101.2±8.2	100.8±8.0	Time		0.41
	Arterial	PLA	100.1±8.9	101.8±9.7	101.0±7.8	102.6±7.9	100.5±7.6	102.0±9.3	99.5±9.0	100.5±7.2	101.0±8.4	Treatment		0.82
	Pressure	CNL	101.2±6.5	101.2±8.7	99.7±6.4	101.1±7.8	101.6±7.1	103.0±9.0	100.9±7.6	102.3±8.4	101.4±7.7	Treatment x Time		0.91
	(mm Hg)	CNH	98.0±6.4	100.2±7.5	100.4±8.4	101.2±9.7	99.4±7.2	100.0±8.4	100.8±7.7	100.9±8.9	100.1±8.0
		Male	101.2±6.7	102.8±8.0*	100.7±6.5	102.5±6.7	101.3±6.4	103.1±7.0	99.4±6.0	101.2±7.5	101.5±6.9	Gender		0.13
		Female	97.3±8.0†	98.0±8.9†	99.7±9.2*	100.1±10.9	99.2±8.5	99.0±11.2†	102.1±10.7*	101.2±9.4*	99.6±9.6	Time x Gender		0.01
		PLA M	102.5±8.0	104.3±8.9	101.5±7.3	103.3±7.5	102.3±6.5	103.7±7.6	97.3±6.0	98.9±5.7	101.7±7.4	Treatment x Gender		0.77
		PLA F	95.9±9.2	97.4±9.8	99.9±9.0	101.4±8.8	97.4±8.8	98.8±11.4	103.6±12.0	103.5±9.0	99.7±9.8	T x T x G		0.26
		CNL M	102.7±6.4	103.0±8.5	100.6±6.3	102.1±6.5	102.9±6.2	104.6±6.6	100.2±4.5	103.6±7.1	102.5±6.6
		CNL F	98.5±6.3	97.9±8.4	98.0±6.6	99.4±9.9	99.4±8.3	100.0±12.1	102.0±11.6	99.9±10.3	99.4±9.1
		CNH M	98.4±4.8	101.1±6.3	100.0±6.0	102.1±6.3	98.6±6.1	101.0±6.7	100.9±7.0	101.2±8.9	100.4±6.6
		CNH F	97.4±8.9	98.7±9.5	101.2±11.8	99.6±14.2	100.7±9.0	98.1±11.1	100.6±9.3	100.4±9.5	99.6±10.2
	Pulse	Overall	40.6±7.9	38.4±8.5*	40.3±6.9	37.4±8.7*	40.5±8.4	37.6±7.8*	40.1±8.2	37.6±9.3*	39.1±8.3	Time		0.002
	Pressure	PLA	41.2±9.0	37.6±8.3	39.7±7.2	37.1±10.2	39.1±9.0	38.6±8.7	38.1±8.4	36.6±8.0	38.5±8.6	Treatment		0.52
	(mm Hg)	CNL	41.0±5.8	39.6±7.3	40.4±6.7	37.5±8.5	41.6±9.2	38.3±7.9	42.9±6.5	38.8±11.3	40.0±8.1	Treatment x Time		0.96
		CNH	39.6±8.7	37.9±9.9	41.0±7.0	37.7±7.5	40.9±7.0	35.9±6.8	39.3±8.9	37.4±8.5	38.7±8.2
		Male	40.7±7.8	38.4±8.2	40.4±6.9	39.0±9.1	40.0±9.3	38.3±8.0	39.3±7.4	37.9±10.0	39.2±8.4	Gender		0.63
		Female	40.4±8.4	38.3±9.1	40.3±7.2	34.6±7.3	41.5±6.5	36.5±7.5	41.4±9.4	37.1±8.2	38.7±8.2	Time x Gender		0.23
		PLA M	42.6±9.1	38.1±8.7	40.3±7.9	39.7±10.4	38.4±9.9	40.4±9.3	36.6±6.2	36.0±8.6	39.0±8.9	Treatment x Gender		0.25
		PLA F	38.8±8.8	36.6±7.8	38.6±5.8	32.4±8.3	40.2±7.6	35.4±6.8	40.8±11.3	37.6±7.3	37.6±8.2	T x T x G		0.69
		CNL M	42.0±4.6	40.7±7.2	40.4±6.2	38.3±9.4	42.0±10.8	38.9±7.3	43.0±6.8	40.1±12.3	40.7±8.3
		CNL F	39.2±7.6	37.6±7.5	40.2±7.9	36.0±6.7	40.8±5.9	37.2±9.2	42.6±6.3	36.4±9.4	38.8±7.6
		CNH M	37.6±8.2	36.4±8.6	40.4±6.7	39.0±7.6	39.4±7.2	35.4±6.9	38.4±8.0	37.4±8.8	38.0±7.7
		CNH F	43.2±8.9	40.6±11.8	42.0±7.9	35.4±7.0	43.4±6.0	36.8±7.0	40.8±10.7	37.2±8.5	39.9±8.8
	Heart Rate	Overall	61.0±9.7	72.7±11.9*	75.5±9.3*	85.4±11.7*	59.5±9.0	73.4±11.3*	76.1±10.1*	85.7±12.6*	73.7±14.0	Time		0.001
	(BPM)	PLA	61.6±10.9	72.4±14.1	75.1±9.2	85.2±11.1	57.8±8.6	72.4±11.6	77.4±10.5	85.3±13.0	73.4±14.4	Treatment		0.94
		CNL	61.3±10.4	72.7±10.7	77.0±9.1	87.9±12.6	59.8±7.3	74.0±10.5	73.8±9.4	83.9±13.3	73.8±13.8	Treatment x Time		0.18
		CNH	59.9±7.8	73.1±10.9	74.3±9.7	83.0±11.4	61.0±10.9	73.7±12.1	77.2±10.2	87.9±11.7	73.8±13.9
		Male	57.8±7.8	69.1±8.5*	75.0±9.0*	84.0±11.4*	57.8±8.9	70.6±9.6*	76.6±9.9*	85.9±11.9*	72.1±13.8	Gender		0.01
		Female	66.7±10.4†	79.3±14.3†*	76.2±10.0*	87.7±12.1*	62.7±8.4†*	78.4±12.4†*	75.3±10.5*	85.3±14.1*	76.4±14.0†	Time x Gender		0.001
		PLA M	58.3±7.2	67.4±8.6	76.2±8.0	85.1±12.2	56.6±8.5	69.7±10.8	78.3±9.5	85.2±12.2	72.1±14.1	Treatment x Gender		0.84
		PLA F	67.6±14.0	81.2±17.9	73.0±11.1	85.3±9.4	60.0±8.6	77.2±11.8	75.6±12.4	85.4±15.0	75.7±14.8	T x T x G		0.36
		CNL M	57.8±10.4	69.4±9.0	75.3±8.9	83.7±11.3	58.1±6.4	71.8±8.5	74.6±10.2	83.4±12.7	71.8±13.4
		CNL F	67.6±7.2	78.6±11.5	80.0±9.2	95.4±11.7	62.8±8.1	78.0±12.9	72.4±8.2	84.8±14.9	77.5±14.0
		CNH M	57.2±5.1	70.3±7.9	73.6±10.2	83.3±11.4	58.7±11.5	70.2±9.8	76.9±10.1	89.2±10.5	72.4±14.1
		CNH F	64.8±9.5	78.0±14.0	75.6±9.3	82.5±12.0	65.2±8.7	80.0±13.6	77.8±10.9	85.6±13.9	76.2±13.2
	Rate	Overall	6899±1173	8261±1436*	8580±1167*	9727±1493*	6789±1137	8363±1384*	8641±1215*	9733±1590*	8374±1681	Time		0.001
	Pressure	PLA	7001±1332	8248±1690	8581±1286	9793±1496	6542±941	8296±1413	8673±1376	9600±1586	8342±1742	Treatment		0.87
	Product	CNL	7040±1259	8283±1227	8696±1022	9945±1432	6900±919	8553±1322	8493±1218	9644±1686	8445±1616	Treatment x Time		0.5
	(mm Hg x	CNH	6658±883	8252±1405	8463±1210	9442±1556	6924±1465	8239±1445	8756±1060	9954±1528	8336±1688
	BPM)	Male	6629±983	7970±1081	8551±1030	9691±1382	6621±1097	8176±1261	8604±1105	9773±1539	8252±1632	Gender		0.1
		Female	7386±1339	8785±1822	8632±1400	9791±1697	7091±1164	8698±1548	8707±1411	9660±1701	8594±1747	Time x Gender		0.07
		PLA M	6790±842	7890±1225	8750±1024	9926±1674	6491±946	8192±1554	8572±1171	9446±1492	8258±1672	Treatment x Gender		0.94
		PLA F	7380±1934	8892±2239	8278±1680	9554±1149	6634±977	8483±1171	8855±1742	9877±1790	8494±1862	T x T x G		0.23
		CNL M	6757±1347	8061±1058	8579±997	9556±1042	6791±840	8431±1074	8533±1135	9730±1575	8305±1528
		CNL F	7549±935	8685±1458	8906±1086	10644±1805	7098±1065	8774±1727	8422±1418	9491±1950	8696±1745
		CNH M	6340±595	7959±1004	8324±1080	9591±1405	6581±1449	7906±1115	8706±1062	10144±1555	8194±1701
		CNH F	7230±1052	8779±1880	8714±1441	9175±1847	7541±1348	8838±1815	8846±1109	9612±1495	8592±1644
	Data are means ± SD. MANOVA analysis revealed overall Wilks' Lambda treatment (p = 0.93), time (p = 0.001), gender (p = .03), treatment x time (p = 0.38), treatment x gender (p = 0.71), time x gender (p = 0.005), and treatment x time x gender (p = 0.45). Greenhouse-Geisser univariate p-levels are presented for each variable. p<0.05 is considered significant. PLA = placebo (0 g), CNL = creatine ni…

## Sheet: Supplement Table 2
	Table S2: White Blood Cell Counts
			Day
		Treatment	0	1	5	6	Mean	Interaction		p-Level
	White	Overall	6.29±1.18	6.33±1.03	6.48±1.18	6.22±1.09	6.35±1.09	Time		0.34
	Blood	PLA	6.25±1.21	6.26±1.13	6.51±1.16	6.37±1.05	6.30±1.12	Treatment		0.97
	Cell	CNL	6.27±1.19	6.51±1.06	6.35±1.25	6.31±1.00	6.39±1.03	Treatment x Time		0.64
	(K/µL)	CNH	6.35±1.18	6.25±0.91	6.56±1.18	6.00±1.22	6.36±1.13
		Male	6.33±1.18	6.49±1.00	6.51±1.22	6.32±0.99	6.42±1.07	Gender		0.31
		Female	6.23±1.19	6.08±1.06	6.43±1.13	6.06±1.25	6.22±1.11	Time x Gender		0.62
		PLA M	6.43±1.09	6.34±1.18	6.69±1.21	6.52±1.11	6.46±1.12	Treatment x Gender		0.62
		PLA F	5.89±1.43	6.09±1.10	6.15±1.05	6.06±0.93	5.99±1.07	T x T x G		0.63
		CNL M	6.20±1.34	6.85±0.64	6.41±1.44	6.41±0.94	6.43±1.07
		CNL F	6.38±1.01	6.01±1.37	6.28±0.97	6.17±1.13	6.33±0.95
		CNH M	6.33±1.20	6.32±1.01	6.40±1.10	6.03±0.90	6.38±1.04
		CNH F	6.39±1.20	6.13±0.75	6.83±1.33	5.94±1.69	6.33±1.28
	Lymphocyte	Overall	2.29±0.60	2.34±0.63	2.43±0.60*	2.23±0.59	2.31±0.60	Time		0.006
	(K/µL)	PLA	2.31±0.62	2.33±0.67	2.42±0.65	2.30±0.65	2.32±0.63	Treatment		0.84
		CNL	2.28±0.60	2.35±0.66	2.45±0.53	2.35±0.47	2.32±0.59	Treatment x Time		0.39
		CNH	2.28±0.62	2.36±0.59	2.41±0.61	2.05±0.60	2.29±0.60
		Male	2.32±0.51	2.44±0.57	2.44±0.55	2.39±0.54	2.38±0.53	Gender		0.12
		Female	2.24±0.75	2.19±0.70	2.41±0.68	1.96±0.58†*	2.17±0.70	Time x Gender		0.01
		PLA M	2.38±0.51	2.46±0.65	2.46±0.65	2.44±0.66	2.42±0.60	Treatment x Gender		0.89
		PLA F	2.19±0.82	2.06±0.68	2.34±0.70	2.01±0.56	2.12±0.65	T x T x G		0.66
		CNL M	2.21±0.45	2.46±0.49	2.45±0.48	2.54±0.37	2.37±0.48
		CNL F	2.38±0.79	2.19±0.85	2.46±0.63	2.08±0.48	2.21±0.74
		CNH M	2.35±0.57	2.39±0.60	2.40±0.51	2.21±0.49	2.35±0.51
		CNH F	2.14±0.71	2.30±0.61	2.43±0.78	1.79±0.70	2.17±0.72
	Mid-Range	Overall	0.64±0.26	0.69±0.34	0.67±0.23	0.61±0.23	0.65±0.26	Time		0.13
	(K/µL)	PLA	0.61±0.20	0.67±0.25	0.67±0.27	0.62±0.22	0.64±0.23	Treatment		0.58
		CNL	0.65±0.31	0.73±0.46	0.67±0.22	0.67±0.23	0.67±0.30	Treatment x Time		0.66
		CNH	0.67±0.26	0.69±0.30	0.67±0.19	0.53±0.23	0.65±0.26
		Male	0.59±0.19	0.66±0.20	0.67±0.25	0.62±0.24	0.63±0.22	Gender		0.28
		Female	0.72±0.34	0.76±0.49	0.67±0.17	0.58±0.21	0.69±0.33	Time x Gender		0.16
		PLA M	0.62±0.21	0.68±0.26	0.68±0.32	0.63±0.22	0.65±0.25	Treatment x Gender		0.39
		PLA F	0.59±0.20	0.65±0.24	0.64±0.18	0.60±0.21	0.62±0.21	T x T x G		0.72
		CNL M	0.54±0.10	0.66±0.20	0.65±0.25	0.70±0.21	0.62±0.19
		CNL F	0.81±0.44	0.82±0.69	0.70±0.18	0.62±0.25	0.75±0.43
		CNH M	0.61±0.22	0.63±0.13	0.67±0.20	0.55±0.26	0.63±0.22
		CNH F	0.76±0.31	0.79±0.46	0.68±0.18	0.51±0.17	0.68±0.31
	Granulocyte	Overall	3.37±0.95	3.30±0.89	3.38±0.94	3.39±1.03	3.39±0.91	Time		0.78
	(K/µL)	PLA	3.33±0.78	3.27±0.83	3.41±0.99	3.44±0.94	3.34±0.86	Treatment		0.9
		CNL	3.35±1.26	3.42±1.07	3.24±0.89	3.30±0.75	3.41±0.89	Treatment x Time		0.83
		CNH	3.43±0.81	3.22±0.77	3.49±0.95	3.41±1.32	3.43±0.98
		Male	3.43±0.96	3.39±0.75	3.40±0.96	3.30±0.94	3.41±0.88	Gender		0.71
		Female	3.28±0.94	3.13±1.08	3.35±0.92	3.52±1.16	3.37±0.97	Time x Gender		0.3
		PLA M	3.45±0.76	3.21±0.83	3.54±1.10	3.44±1.09	3.40±0.93	Treatment x Gender		0.66
		PLA F	3.10±0.81	3.39±0.87	3.16±0.74	3.44±0.59	3.24±0.72	T x T x G		0.44
		CNL M	3.46±1.30	3.72±0.62	3.32±0.95	3.17±0.79	3.43±0.88
		CNL F	3.20±1.25	2.99±1.45	3.13±0.84	3.49±0.69	3.38±0.93
		CNH M	3.38±0.87	3.31±0.71	3.34±0.85	3.27±0.94	3.40±0.84
		CNH F	3.51±0.73	3.06±0.88	3.73±1.10	3.63±1.85	3.48±1.19
	Data are means ± SD. Multivariate analysis revealed overall Wilks' Lambda treatment (p = 0.94), time (p = 0.02), gender (p = 0.10), treatment x time (p = 0.73), treatment x gender (p = 0.86), time x gender (p = 0.36), and treatment x time x gender (p = 0.96). Greenhouse-Geisser univariate p-levels are presented for each variable. p<0.05 is considered significant.PLA = placebo (0 g), CNL = creatin…

## Sheet: Supplement Table 3
	Table S3: Red Blood Cell Counts
			Day
		Treatment	0	1	5	6	Mean	Interaction		p-Level
	Red	Overall	4.94±0.55	4.94±0.52	4.96±0.55	4.88±0.54	4.94±0.53	Time		0.57
	Blood	PLA	4.98±0.47	4.95±0.39	4.95±0.49	4.90±0.52	4.94±0.47	Treatment		0.97
	Cell	CNL	4.97±0.64	4.94±0.52	4.96±0.54	4.85±0.59	4.94±0.57	Treatment x Time		0.93
	(M/µL)	CNH	4.87±0.54	4.92±0.66	4.97±0.63	4.89±0.52	4.94±0.57
		Male	5.21±0.44	5.14±0.46	5.25±0.43	5.12±0.46	5.19±0.43	Gender		0.001
		Female	4.48±0.38	4.59±0.43	4.45±0.31	4.46±0.39	4.48±0.38†	Time x Gender		0.19
		PLA M	5.19±0.39	5.06±0.37	5.20±0.39	5.12±0.45	5.15±0.39	Treatment x Gender		0.72
		PLA F	4.55±0.29	4.74±0.36	4.44±0.19	4.46±0.34	4.52±0.31	T x T x G		0.6
		CNL M	5.27±0.55	5.14±0.33	5.27±0.36	5.12±0.54	5.21±0.44
		CNL F	4.45±0.42	4.59±0.62	4.42±0.34	4.36±0.29	4.44±0.42
		CNH M	5.17±0.38	5.25±0.67	5.30±0.56	5.12±0.40	5.20±0.48
		CNH F	4.44±0.44	4.46±0.25	4.49±0.40	4.56±0.52	4.48±0.40
	Hemoglobin	Overall	14.8±1.8	14.8±1.7	14.9±1.8	14.6±1.7	14.8±1.7	Time		0.62
	(g/dl)	PLA	14.9±1.8	14.8±1.4	14.9±1.8	14.6±1.7	14.8±1.6	Treatment		0.94
		CNL	14.9±2.0	14.7±1.7	15.0±1.6	14.7±2.0	14.8±1.8	Treatment x Time		0.96
		CNH	14.6±1.8	14.8±2.2	15.0±2.0	14.6±1.5	14.8±1.8
		Male	15.8±1.4	15.6±1.4	16.0±1.3	15.5±1.3	15.7±1.3	Gender		0.001
		Female	13.2±1.3	13.4±1.5	13.2±1.0	13.1±1.3	13.2±1.2†	Time x Gender		0.48
		PLA M	15.7±1.4	15.3±1.1	15.8±1.2	15.4±1.2	15.6±1.2	Treatment x Gender		0.79
		PLA F	13.4±1.3	13.7±1.4	13.0±0.9	13.1±1.4	13.3±1.2	T x T x G		0.6
		CNL M	16.0±1.7	15.5±0.8	16.0±0.9	15.7±1.7	15.8±1.3
		CNL F	13.2±1.2	13.5±2.0	13.2±0.7	12.9±1.3	13.1±1.3
		CNH M	15.7±1.0	16.0±2.0	16.2±1.6	15.4±1.0	15.8±1.4
		CNH F	13.0±1.5	13.0±0.9	13.4±1.4	13.4±1.2	13.2±1.2
	Hematocrit	Overall	46.1±4.8	46.0±4.6	46.1±5.1	45.2±4.8	45.9±4.8	Time		0.36
	(%)	PLA	46.2±4.4	46.0±3.8	45.8±4.8	45.2±4.6	45.8±4.4	Treatment		0.96
		CNL	46.5±5.4	46.1±4.7	46.1±4.8	45.0±5.6	45.9±5.1	Treatment x Time		0.86
		CNH	45.4±4.7	45.7±5.5	46.3±5.8	45.4±4.2	46.0±4.9
		Male	48.5±3.5	47.7±3.8	48.8±3.9	47.5±3.9	48.1±3.7	Gender		0.001
		Female	41.9±3.7	43.0±4.6	41.4±3.1	41.3±3.5	41.8±3.7†	Time x Gender		0.12
		PLA M	48.2±3.4	46.9±3.3	48.3±3.6	47.3±3.4	47.8±3.4	Treatment x Gender		0.75
		PLA F	42.3±3.6	44.2±4.3	41.0±2.5	41.0±3.8	42.1±3.5	T x T x G		0.65
		CNL M	49.2±4.3	47.7±2.6	49.0±3.3	47.6±5.0	48.4±3.7
		CNL F	41.8±3.5	43.4±6.3	41.2±2.0	40.5±3.5	41.4±4.1
		CNH M	48.1±2.6	48.5±5.3	49.3±4.8	47.6±3.4	48.3±3.9
		CNH F	41.5±4.4	41.7±2.8	41.9±4.3	42.4±3.3	41.9±3.6
	MCV	Overall	93.3±4.0	93.2±4.4	93.0±3.9	92.8±4.0	93.0±4.0	Time		0.07
	(fL)	PLA	92.9±4.2	93.0±4.2	92.6±3.9	92.3±4.0	92.9±4.0	Treatment		0.81
		CNL	93.7±3.9	93.6±5.1	93.2±3.9	92.9±4.1	93.1±4.2	Treatment x Time		0.55
		CNH	93.4±4.0	93.0±4.0	93.3±4.0	93.2±4.0	93.1±4.0
		Male	93.2±3.8	92.9±3.6	93.0±3.7	92.8±3.7	92.9±3.6	Gender		0.79
		Female	93.6±4.4	93.7±5.5	93.0±4.3	92.7±4.5	93.3±4.7	Time x Gender		0.14
		PLA M	92.9±4.1	92.9±3.8	92.8±3.9	92.5±3.9	92.8±3.7	Treatment x Gender		0.95
		PLA F	93.0±4.6	93.2±5.3	92.3±4.3	91.8±4.3	93.1±4.6	T x T x G		0.95
		CNL M	93.6±3.7	93.1±3.9	93.1±3.8	93.0±3.7	93.0±3.6
		CNL F	94.1±4.6	94.5±7.0	93.5±4.4	92.9±4.9	93.4±5.0
		CNH M	93.2±3.7	92.6±3.3	93.2±3.7	93.0±3.7	93.0±3.6
		CNH F	93.7±4.6	93.5±4.9	93.3±4.7	93.3±4.7	93.5±4.5
	MCH	Overall	30.0±1.3	29.9±1.5	30.2±1.4	30.0±1.2	30.0±1.3	Time		0.02
	(pg/cell)	PLA	29.9±1.5	29.8±1.5	30.0±1.3	29.8±1.2	29.9±1.4	Treatment		0.72
		CNL	30.1±1.2	29.8±1.3	30.2±1.4	30.2±1.4	30.0±1.3	Treatment x Time		0.66
		CNH	30.0±1.3	30.0±1.5	30.3±1.3	29.8±1.2	30.0±1.3
		Male	30.3±1.1	30.3±1.2	30.4±1.0	30.3±1.1	30.3±1.1	Gender		0
		Female	29.5±1.5	29.1±1.5	29.7±1.8	29.4±1.4	29.5±1.6†	Time x Gender		0.2
		PLA M	30.2±1.4	30.2±1.4	30.3±1.1	30.2±1.1	30.2±1.2	Treatment x Gender		0.91
		PLA F	29.3±1.5	28.9±1.5	29.3±1.5	29.2±1.3	29.4±1.5	T x T x G		0.68
		CNL M	30.3±0.8	30.2±1.1	30.4±1.0	30.6±1.0	30.2±1.0
		CNL F	29.7±1.7	29.3±1.6	29.9±2.1	29.6±1.8	29.5±1.7
		CNH M	30.4±1.0	30.5±1.3	30.5±0.8	30.1±1.1	30.3±1.1
		CNH F	29.4±1.5	29.2±1.6	29.9±1.8	29.5±1.2	29.5±1.5
	MCHC	Overall	32.1±1.0	32.0±1.3	32.4±0.9*	32.3±0.9	32.2±1.0	Time		0.007
	(g/dl)	PLA	32.2±1.2	32.1±1.4	32.4±0.7	32.3±0.9	32.3±1.0	Treatment		0.98
		CNL	32.1±1.0	31.9±1.3	32.5±0.9	32.5±0.8	32.2±1.1	Treatment x Time		0.38
		CNH	32.1±1.0	32.2±1.3	32.4±1.0	32.0±0.9	32.2±1.0
		Male	32.5±0.9	32.6±1.0	32.7±0.6	32.6±0.7	32.6±0.8	Gender		0.001
		Female	31.5±0.9	31.1±1.2	31.9±1.0	31.8±0.9	31.6±1.1†	Time x Gender		0.06
		PLA M	32.5±1.1	32.6±1.1	32.7±0.5	32.6±0.8	32.6±0.9	Treatment x Gender		0.94
		PLA F	31.6±1.0	31.1±1.3	31.7±0.5	31.8±0.8	31.6±1.0	T x T x G		0.92
		CNL M	32.4±0.8	32.3±1.0	32.7±0.7	32.9±0.5	32.5±0.9
		CNL F	31.6±1.0	31.0±1.3	32.0±1.0	31.9±0.9	31.6±1.1
		CNH M	32.6±0.8	32.9±0.9	32.7±0.6	32.3±0.6	32.6±0.7
		CNH F	31.4±0.9	31.2±1.2	32.0±1.3	31.6±1.1	31.5±1.1
	RDW	Overall	13.4±1.1	13.4±1.2	13.4±1.1	13.4±1.1	13.3±1.1	Time		0.75
	(%)	PLA	13.4±0.9	13.3±1.2	13.3±1.0	13.4±1.1	13.3±1.0	Treatment		0.99
		CNL	13.4±1.1	13.5±1.2	13.3±1.1	13.3±1.0	13.4±1.0	Treatment x Time		0.54
		CNH	13.4±1.3	13.4±1.3	13.5±1.2	13.6±1.2	13.4±1.2
		Male	13.1±0.7	13.0±0.6	13.1±0.7	13.2±0.7	13.1±0.7	Gender		0.002
		Female	13.8±1.4	14.1±1.6	13.8±1.5	13.8±1.5	13.8±1.5†	Time x Gender		0.06
		PLA M	13.1±0.5	13.0±0.8	13.1±0.8	13.1±0.6	13.1±0.7	Treatment x Gender		0.95
		PLA F	13.9±1.2	14.1±1.5	13.7±1.4	14.0±1.6	13.7±1.4	T x T x G		0.75
		CNL M	13.1±0.7	13.1±0.6	13.0±0.7	13.2±0.8	13.1±0.7
		CNL F	13.8±1.5	14.1±1.7	13.8±1.5	13.6±1.4	13.8±1.4
		CNH M	13.0±0.8	12.9±0.4	13.1±0.7	13.2±0.7	13.1±0.6
		CNH F	13.8±1.7	14.0±1.8	14.0±1.7	14.0±1.6	13.9±1.6
	Platelet	Overall	213±55	219±56	213±55	217±56	211±57	Time		0.32
	Count	PLA	216±59	223±65	206±63	216±60	212±61	Treatment		0.84
	(x103/µL)	CNL	202±52	214±52	216±53	214±60	208±55	Treatment x Time		0.2
		CNH	220±56	221±52	219±48	220±50	213±53
		Male	194±45	197±42	192±38	196±43	190±43	Gender		0.001
		Female	245±58	257±58	250±59	252±59	250±58†	Time x Gender		0.68
		PLA M	190±46	196±42	186±39	193±35	189±41	Treatment x Gender		0.56
		PLA F	268±46	276±72	246±83	261±76	256±69	T x T x G		0.37
		CNL M	187±47	196±41	194±39	190±52	185±43
		CNL F	227±55	246±55	255±54	256±51	249±52
		CNH M	207±43	201±46	197±39	206±43	196±46
		CNH F	239±68	251±47	249±44	241±54	245±52
	MPV	Overall	10.0±1.1	9.9±1.2	10.0±1.3	9.8±1.2	10.1±1.5	Time		0.33
	(fL)	PLA	9.9±1.0	9.8±1.0	10.2±1.6	9.9±1.2	10.0±1.3	Treatment		0.95
		CNL	10.0±1.1	10.0±1.4	9.8±0.9	10.0±1.5	10.1±1.4	Treatment x Time		0.21
		CNH	10.0±1.2	9.9±1.3	9.9±1.2	9.6±1.0	10.2±1.6
		Male	10.2±1.0	10.1±1.0	10.3±1.2	10.2±1.1	10.5±1.4	Gender		0.004
		Female	9.6±1.1	9.5±1.4	9.4±1.2	9.1±1.1	9.4±1.2†	Time x Gender		0.11
		PLA M	10.0±1.0	10.1±0.9	10.6±1.5	10.3±1.0	10.4±1.2	Treatment x Gender		0.79
		PLA F	9.6±1.1	9.1±0.9	9.3±1.4	9.0±1.2	9.3±1.1	T x T x G		0.34
		CNL M	10.3±1.1	10.2±1.0	9.9±0.7	10.4±1.4	10.4±1.3
		CNL F	9.5±1.0	9.6±1.9	9.5±1.1	9.4±1.5	9.4±1.3
		CNH M	10.3±1.0	10.1±1.2	10.2±1.2	10.0±0.9	10.5±1.7
		CNH F	9.7±1.4	9.7±1.5	9.5±1.2	9.1±0.9	9.5±1.2
	Data are means ± SD. Multivariate analysis revealed overall Wilks' Lambda treatment (p = 0.99), time (p = 0.008), gender (p = 0.001), treatment x time (p = 0.90), treatment x gender (p = 0.99), time x gender (p = 0.15), and treatment x time x gender (p = 0.56). Greenhouse-Geisser univariate p-levels are presented for each variable. p<0.05 is considered significant. PLA = placebo (0 g), CNL = crea…

## Sheet: Supplement Table 4
	Table S4: Kidney Function Markers
			Day
		Treatment	0	1	5	6	Mean	Interaction		p-Level
	BUN	Overall	14.2±3.6	14.0±4.1	14.8±4.0	14.7±4.2	14.4±4.0	Time		0.15
	(mg/dl)	PLA	14.7±4.1	13.7±4.0	14.9±3.9	14.6±4.8	14.5±4.2	Treatment		0.91
		CNL	13.8±3.1	13.4±3.8	14.8±4.4	15.0±4.2	14.3±3.9	Treatment x Time		0.24
		CNH	14.1±3.7	14.9±4.6	14.8±3.7	14.5±3.7	14.6±3.9
		Male	15.4±3.4	15.6±3.9	16.7±3.3*	16.7±3.5*	16.1±3.6	Gender		0.001
		Female	12.1±2.9†	11.1±2.7†	11.5±2.8†	11.2±2.7†	11.5±2.8†	Time x Gender		0.01
		PLA M	16.3±3.6	15.2±3.7	16.8±3.2	16.9±4.2	16.3±3.7	Treatment x Gender		0.89
		PLA F	11.8±3.4	11.1±3.0	11.5±2.8	10.5±2.3	11.2±2.8	T x T x G		0.25
		CNL M	14.5±3.0	15.2±3.1	16.9±3.9	17.0±3.3	15.9±3.4
		CNL F	12.6±2.8	10.1±2.4	11.0±2.2	11.6±3.4	11.3±2.8
		CNH M	15.4±3.6	16.5±4.7	16.3±2.9	16.2±3.2	16.1±3.6
		CNH F	11.8±2.6	12.0±2.7	12.0±3.4	11.5±2.4	11.8±2.7
	Creatinine	Overall	0.97±0.19	0.98±0.18	0.98±0.19	0.96±0.17	0.97±0.18	Time		0.24
	(mg/dl)	PLA	0.96±0.18	0.98±0.18	0.95±0.20	0.95±0.17	0.96±0.18	Treatment		0.7
		CNL	1.01±0.20	0.99±0.18	0.97±0.16	0.94±0.15*	0.98±0.17	Treatment x Time		0.007
		CNH	0.93±0.17	0.98±0.18	1.02±0.20*	0.99±0.18	0.98±0.19
		Male	1.04±0.16	1.07±0.15	1.05±0.15	1.04±0.14	1.05±0.15	Gender		0.001
		Female	0.83±0.17	0.83±0.11	0.85±0.19	0.82±0.11	0.83±0.15†	Time x Gender		0.46
		PLA M	1.04±0.16	1.06±0.16	1.04±0.18	1.03±0.14	1.04±0.15	Treatment x Gender		0.82
		PLA F	0.81±0.14	0.83±0.12	0.79±0.10	0.79±0.12	0.80±0.12	T x T x G		0.43
		CNL M	1.08±0.15	1.08±0.16	1.04±0.14	1.01±0.12	1.05±0.14
		CNL F	0.87±0.21	0.82±0.08	0.83±0.09	0.82±0.11	0.84±0.13
		CNH M	1.00±0.16	1.07±0.15	1.07±0.13	1.07±0.15	1.05±0.15
		CNH F	0.82±0.15	0.83±0.14	0.93±0.29	0.84±0.12	0.86±0.18
	BUN/	Overall	14.9±3.5	14.4±3.8	15.2±3.2	15.4±3.7	15.0±3.6	Time		0.11
	Creatinine	PLA	15.5±4.0	14.3±3.8	15.7±3.1	15.4±4.1	15.2±3.8	Treatment		0.8
	Ratio	CNL	14.0±2.8	13.7±3.6	15.2±3.4	15.9±3.4*	14.7±3.4	Treatment x Time		0.03
		CNH	15.3±3.7	15.3±4.0	14.6±3.2	14.9±3.6	15.0±3.6
		Male	15.0±3.7	14.8±3.8	16.0±3.1*	16.3±3.6*	15.5±3.6	Gender		0.02
		Female	14.7±3.4	13.6±3.8	13.7±3.0†	13.9±3.3†	14.0±3.4†	Time x Gender		0.01
		PLA M	15.9±3.7	14.5±3.5	16.2±2.8	16.5±4.1	15.8±3.6	Treatment x Gender		1
		PLA F	14.9±4.6	13.9±4.6	14.7±3.5	13.5±3.3	14.2±3.9	T x T x G		0.17
		CNL M	13.5±2.9	14.4±3.7	16.2±3.3	16.9±3.0	15.3±3.4
		CNL F	14.8±2.5	12.4±3.0	13.3±2.8	14.2±3.5	13.7±3.0
		CNH M	15.7±4.1	15.6±4.2	15.5±3.3	15.5±3.6	15.6±3.7
		CNH F	14.5±3.0	14.6±3.7	13.1±2.7	13.9±3.4	14.0±3.2
	Data are means ± SD. Multivariate analysis revealed overall Wilks' Lambda treatment (p = 0.92), time (p = 0.08), gender (p = 0.001), treatment x time (p = 0.23), treatment x gender (p = 0.94), time x gender (p = 0.15), and treatment x time x gender (p = 0.19). Greenhouse-Geisser univariate p-levels are presented for each variable. p<0.05 is considered significant. PLA = placebo (0 g), CNL = creat…

## Sheet: Supplement Table 5
	Table S5: Liver Enzymes
			Day
		Treatment	0	1	5	6	Mean	Interaction		p-Level
	ALP	Overall	80.4±22.2	77.9±20.1*	81.1±21.4	79.6±20.8	80.0±21.0	Time		0.04
	(U/L)	PLA	80.1±21.5	78.4±20.5	80.1±19.5	78.6±20.0	80.2±20.2	Treatment		0.99
		CNL	81.5±23.7	77.5±21.4	81.8±22.9	79.9±20.6	80.4±21.8	Treatment x Time		0.73
		CNH	79.7±22.1	77.7±19.2	81.5±22.2	80.4±22.3	79.3±21.3
		Male	84.4±22.4	81.6±19.5	84.5±19.7	83.4±20.0	82.6±20.5	Gender		0.03
		Female	73.4±20.3	71.2±19.8	75.0±23.1	72.7±20.7	75.1±21.2†	Time x Gender		0.88
		PLA M	83.8±20.6	80.7±19.6	84.0±17.6	82.3±18.6	82.4±19.4	Treatment x Gender		0.8
		PLA F	73.3±22.5	74.3±22.7	72.9±21.7	71.9±21.7	75.9±21.3	T x T x G		0.68
		CNL M	86.7±24.0	83.7±21.7	86.2±21.4	84.7±20.8	84.6±21.7
		CNL F	72.1±21.0	66.4±16.4	73.9±24.6	71.3±18.3	72.8±20.3
		CNH M	82.5±23.6	80.4±18.2	83.2±21.0	83.3±21.7	80.8±20.7
		CNH F	74.7±19.5	72.9±20.9	78.4±25.0	75.1±23.7	76.6±22.4
	ALT	Overall	20.7±8.7	20.6±9.2	20.3±9.0	21.1±11.3	21.1±9.8	Time		0.67
	(U/L)	PLA	21.5±9.5	21.1±9.1	20.5±9.1	21.0±8.4	21.5±9.1	Treatment		0.78
		CNL	20.9±7.1	20.7±7.3	21.5±10.6	23.1±15.7	21.7±11.1	Treatment x Time		0.64
		CNH	19.9±9.4	19.9±11.2	19.1±7.2	19.4±8.0	20.1±9.3
		Male	22.8±8.7	22.6±9.7	22.7±9.9	24.0±12.8	23.3±10.7	Gender		0.001
		Female	17.0±7.4	16.9±7.0	16.0±5.2	16.0±4.7	17.1±6.2†	Time x Gender		0.37
		PLA M	23.1±8.5	22.3±8.1	22.6±9.6	23.4±8.3	23.1±8.7	Treatment x Gender		0.55
		PLA F	18.6±11.0	18.9±10.7	16.6±7.1	16.6±6.9	18.5±9.2	T x T x G		0.68
		CNL M	23.6±6.6	23.8±7.1	25.1±11.7	27.3±18.3	25.0±12.4
		CNL F	16.0±5.3	15.3±3.7	15.0±3.1	15.6±2.6	15.8±3.7
		CNH M	21.9±10.9	21.8±13.2	20.5±8.0	21.3±9.1	21.8±10.8
		CNH F	16.3±4.8	16.5±5.0	16.6±5.0	15.9±4.0	17.0±4.3
	AST	Overall	25.2±9.3	26.3±9.2	25.3±14.4	26.4±13.2	26.0±12.1	Time		0.65
	(U/L)	PLA	25.2±9.4	27.1±8.9	26.5±17.4	27.3±11.2	26.8±12.4	Treatment		0.37
		CNL	28.4±10.9	28.0±9.6	25.5±16.6	27.2±17.5	27.4±14.4	Treatment x Time		0.72
		CNH	22.0±5.9	23.9±9.1	23.8±7.5	24.6±9.7	23.8±8.5
		Male	27.4±9.9	28.9±9.6	28.0±16.9	29.5±15.2	28.4±13.8	Gender		0.001
		Female	21.1±6.3	21.7±6.5	20.4±5.9	20.7±4.9	21.5±6.0†	Time x Gender		0.69
		PLA M	26.8±10.0	28.4±8.9	29.0±21.0	29.9±12.5	28.4±14.1	Treatment x Gender		0.22
		PLA F	22.2±7.6	24.8±8.8	21.9±6.6	22.6±6.9	23.6±7.5	T x T x G		0.86
		CNL M	32.4±11.3	32.3±9.3	30.2±19.2	31.4±20.7	31.4±16.3
		CNL F	21.2±5.3	20.4±3.0	17.2±3.2	19.5±3.0	20.2±3.8
		CNH M	23.1±5.7	26.0±10.0	24.7±8.2	27.2±11.0	25.4±9.4
		CNH F	19.9±6.0	20.0±5.8	22.2±6.3	19.9±3.9	20.9±5.5
	Data are means ± SD. Multivariate analysis revealed overall Wilks' Lambda treatment (p = 0.90), time (p = 0.001), gender (p = 0.001), treatment x time (p = 0.66), treatment x gender (p = 0.78), time x gender (p = 0.98), and treatment x time x gender (p = 0.87). Greenhouse-Geisser univariate p-levels are presented for each variable. p<0.05 is considered significant. PLA = placebo (0 g), CNL = crea…

## Sheet: Supplement Table 6
	Table S6: Muscle Catabolism Markers
			Day
		Treatment	0	1	5	6	Mean	Interaction		p-Level
	CK	Overall	227±268	334±306	404±1329	498±1204	371±967	Time		0.26
	(U/L)	PLA	226±177	327±242	345±609	432±441	322±407	Treatment		0.6
		CNL	263±418	401±429	624±2196	714±1988	521±1592	Treatment x Time		0.82
		CNH	193±113	275±191	244±398	350±482	272±349
		Male	287±315	436±337	552±1638	675±1469	500±1181	Gender		0.03
		Female	120±80	152±83	138±188	181±209	133±80†	Time x Gender		0.39
		PLA M	280±194	420±254	423±719	541±461	422±472	Treatment x Gender		0.62
		PLA F	129±83	158±72	204±317	235±341	132±65	T x T x G		0.78
		CNL M	346±505	530±488	914±2721	1004±2454	726±1954
		CNL F	114±63	169±100	103±50	191±116	146±96
		CNH M	236±98	357±186	320±482	479±564	356±409
		CNH F	116±97	129±78	107±61	118±64	122±76
	LDH	Overall	158±21	160±25	164±46	165±37	161±34	Time		0.38
	(U/L)	PLA	158±17	157±19	163±27	162±21	159±21	Treatment		0.93
		CNL	158±24	159±29	167±68	173±55	163±49	Treatment x Time		0.66
		CNH	158±23	163±25	163±34	160±25	160±27
		Male	159±19	162±26	170±52	171±42	164±38	Gender		0.09
		Female	156±25	155±22	154±31	154±20	156±25	Time x Gender		0.18
		PLA M	160±16	158±20	168±28	166±21	162±22	Treatment x Gender		0.8
		PLA F	154±18	156±19	155±22	154±21	154±20	T x T x G		0.39
		CNL M	159±21	161±31	179±83	181±66	168±58
		CNL F	157±29	154±25	145±14	157±19	156±23
		CNH M	159±20	167±26	163±25	165±24	162±24
		CNH F	156±27	155±24	162±48	151±23	158±32
	Data are means ± SD. Multivariate analysis revealed overall Wilks' Lambda treatment (p = 0.81), time (p = 0.001), gender (p = 0.10), treatment x time (p = 0.55), treatment x gender (p = 0.91), time x gender (p = 0.03), and treatment x time x gender (p = 0.87). Greenhouse-Geisser univariate p-levels are presented for each variable. PLA = placebo (0 g), CNL = creatine nitrate low dose (3 g), CNH = …

## Sheet: Supplement Table 7
	Table S7. Lipid Profile
			Day
		Treatment	0	1	5	6	Mean	Interaction		p-Level
	Total-C	Overall	3.92±1.03	3.84±0.92	3.82±0.92*	3.82±0.90*	3.83±0.97	Time		0.005
	(mmol/l)	PLA	3.88±0.88	3.84±0.87	3.83±0.91	3.80±0.88	3.82±0.90	Treatment		0.99
		CNL	4.03±1.13	3.81±0.81	3.79±0.95	3.83±0.87	3.83±0.97	Treatment x Time		0.21
		CNH	3.86±1.08	3.85±1.08	3.84±0.93	3.82±0.98	3.82±1.04
		Male	3.84±1.10	3.76±1.04	3.85±1.10	3.86±1.06	3.80±1.09	Gender		0.77
		Female	4.07±0.89	3.97±0.63	3.77±0.45*	3.75±0.53*	3.88±0.69	Time x Gender		0.001
		PLA M	3.83±1.02	3.71±0.99	3.91±1.11	3.86±1.04	3.79±1.05	Treatment x Gender		0.99
		PLA F	3.98±0.58	4.08±0.56	3.69±0.36	3.69±0.50	3.87±0.54	T x T x G		0.22
		CNL M	3.92±1.13	3.81±0.97	3.82±1.15	3.85±1.02	3.80±1.07
		CNL F	4.23±1.17	3.83±0.44	3.75±0.41	3.79±0.54	3.90±0.76
		CNH M	3.78±1.20	3.76±1.20	3.82±1.08	3.86±1.17	3.79±1.17
		CNH F	4.00±0.89	4.00±0.86	3.87±0.59	3.76±0.58	3.88±0.75
	HDL-C	Overall	1.44±0.39	1.41±0.35	1.45±0.35	1.44±0.33	1.44±0.37	Time		0.48
	(mmol/l)	PLA	1.43±0.36	1.43±0.37	1.43±0.32	1.45±0.34	1.44±0.36	Treatment		0.99
		CNL	1.49±0.46	1.38±0.30*	1.43±0.32	1.43±0.32	1.43±0.37	Treatment x Time		0.02
		CNH	1.40±0.36	1.41±0.38	1.49±0.42*	1.44±0.35	1.45±0.39
		Male	1.32±0.29	1.27±0.29	1.34±0.28	1.33±0.29	1.31±0.29	Gender		0.001
		Female	1.65±0.47	1.65±0.33	1.64±0.38	1.63±0.33	1.69±0.37†	Time x Gender		0.28
		PLA M	1.33±0.33	1.29±0.32	1.36±0.31	1.37±0.32	1.34±0.33	Treatment x Gender		0.88
		PLA F	1.60±0.35	1.69±0.33	1.57±0.29	1.60±0.35	1.65±0.32	T x T x G		0.39
		CNL M	1.35±0.24	1.26±0.26	1.31±0.26	1.30±0.27	1.29±0.25
		CNL F	1.75±0.65	1.59±0.27	1.64±0.30	1.65±0.31	1.70±0.40
		CNH M	1.29±0.30	1.26±0.29	1.36±0.29	1.33±0.27	1.30±0.29
		CNH F	1.60±0.40	1.67±0.39	1.73±0.53	1.65±0.38	1.72±0.41
	Total-C/	Overall	2.61±1.32	2.53±1.17	2.29±0.96*	2.35±0.96*	2.77±0.77	Time		0.05
	HDL-C	PLA	2.53±1.19	2.57±1.16	2.38±0.97	2.43±0.97	2.75±0.67	Treatment		0.84
	Ratio	CNL	3.05±1.60	2.64±1.32	2.23±0.95	2.32±0.94	2.79±0.78	Treatment x Time		0.16
		CNH	2.26±1.02	2.38±1.04	2.27±0.98	2.31±0.99	2.77±0.85
		Male	2.74±1.53	2.63±1.33	2.40±1.08	2.47±1.06	2.98±0.80	Gender		0.15
		Female	2.38±0.76	2.35±0.80	2.11±0.65	2.15±0.72	2.37±0.50	Time x Gender		0.91
		PLA M	2.62±1.43	2.64±1.39	2.51±1.14	2.54±1.13	2.93±0.69	Treatment x Gender		0.34
		PLA F	2.37±0.59	2.44±0.61	2.14±0.49	2.23±0.59	2.41±0.46	T x T x G		0.79
		CNL M	3.41±1.81	2.87±1.50	2.42±1.12	2.56±1.06	3.02±0.81
		CNL F	2.40±0.86	2.22±0.82	1.89±0.37	1.90±0.46	2.37±0.52
		CNH M	2.19±1.10	2.38±1.10	2.26±1.03	2.31±1.02	3.01±0.90
		CNH F	2.37±0.88	2.38±0.99	2.30±0.94	2.32±0.99	2.34±0.54
	LDL-C	Overall	0.88±0.39	0.81±0.31	0.91±0.42*	0.83±0.33	2.42±1.15	Time		0.03
	(mmol/l)	PLA	0.86±0.30	0.79±0.26	0.89±0.42	0.86±0.38	2.47±1.11	Treatment		0.95
		CNL	0.88±0.44	0.80±0.30	0.91±0.39	0.82±0.26	2.52±1.29	Treatment x Time		0.87
		CNH	0.91±0.44	0.83±0.36	0.93±0.45	0.81±0.35	2.28±1.03
		Male	0.85±0.42	0.81±0.30	0.95±0.41*	0.87±0.34	2.54±1.30	Gender		0.65
		Female	0.94±0.35	0.81±0.32	0.85±0.42	0.76±0.30	2.21±0.76	Time x Gender		0.04
		PLA M	0.85±0.34	0.77±0.27	0.98±0.45	0.90±0.40	2.58±1.30	Treatment x Gender		0.92
		PLA F	0.89±0.22	0.82±0.26	0.73±0.33	0.78±0.35	2.25±0.58	T x T x G		0.35
		CNL M	0.82±0.42	0.80±0.31	0.96±0.38	0.84±0.22	2.75±1.46
		CNL F	0.97±0.50	0.80±0.30	0.83±0.40	0.80±0.32	2.09±0.71
		CNH M	0.88±0.51	0.85±0.34	0.91±0.42	0.88±0.38	2.28±1.08
		CNH F	0.95±0.29	0.80±0.41	0.98±0.52	0.69±0.26	2.29±0.95
	Triglyceride	Overall	2.84±0.79	2.84±0.74*	2.75±0.77	2.76±0.76*	0.86±0.37	Time		0.001
	(mmol/l)	PLA	2.83±0.69	2.80±0.67	2.77±0.66	2.70±0.66	0.86±0.34	Treatment		0.99
		CNL	2.81±0.75	2.89±0.81	2.75±0.77	2.80±0.79	0.84±0.36	Treatment x Time		0.64
		CNH	2.89±0.93	2.84±0.77	2.73±0.88	2.76±0.84	0.87±0.41
		Male	2.99±0.83	3.04±0.77	2.95±0.80	2.97±0.80	0.86±0.37	Gender		0.002
		Female	2.57±0.63	2.48±0.55*	2.39±0.54	2.37±0.50*	0.85±0.36†	Time x Gender		0.045
		PLA M	2.97±0.73	2.97±0.69	2.96±0.69	2.89±0.68	0.87±0.37	Treatment x Gender		0.97
		PLA F	2.56±0.57	2.49±0.52	2.42±0.44	2.38±0.48	0.83±0.29	T x T x G		0.8
		CNL M	2.95±0.75	3.11±0.84	2.98±0.84	3.04±0.84	0.84±0.34
		CNL F	2.56±0.72	2.49±0.60	2.35±0.41	2.36±0.48	0.85±0.39
		CNH M	3.06±1.03	3.05±0.80	2.91±0.91	2.98±0.90	0.87±0.41
		CNH F	2.59±0.66	2.46±0.57	2.41±0.75	2.37±0.58	0.86±0.40
	Data are means ± SD. Multivariate analysis revealed overall Wilks' Lambda treatment (p = 0.99), time (p = 0.001), gender (p = 0.001), treatment x time (p = 0.62), treatment x gender (p = 0.82), time x gender (p = 0.004), and treatment x time x gender (p = 0.28). Greenhouse-Geisser univariate p-levels from are presented for each variable. PLA = placebo (0 g), CNL = creatine nitrate low dose (3 g),…

## Sheet: Supplement Table 8
	Table S8: Blood Glucose
			Day
		Treatment	0	1	5	6	Mean	Interaction		p-Level
	Glucose	Overall	5.10±0.52	4.89±0.40*	4.96±0.54	5.03±0.44	5.00±0.50	Time		0.04
	(mmol/l)	PLA	5.09±0.34	4.85±0.39	4.84±0.48	5.05±0.38	4.97±0.42	Treatment		0.34
		CNL	5.16±0.69	4.84±0.37	4.85±0.32	4.97±0.47	4.97±0.52	Treatment x Time		0.06
		CNH	5.05±0.48	4.98±0.42	5.20±0.68	5.06±0.46	5.07±0.54
		Male	5.16±0.41	4.90±0.47	5.00±0.42	5.16±0.41	5.07±0.44	Gender		0.09
		Female	4.98±0.68	4.86±0.23	4.89±0.70	4.79±0.39	4.89±0.56	Time x Gender		0.09
		PLA M	5.19±0.33	4.81±0.46	4.90±0.56	5.18±0.34	5.03±0.46	Treatment x Gender		0.81
		PLA F	4.90±0.30	4.91±0.22	4.73±0.31	4.81±0.34	4.85±0.30	T x T x G		0.12
		CNL M	5.09±0.45	4.87±0.43	4.93±0.29	5.11±0.42	5.02±0.42
		CNL F	5.28±1.02	4.79±0.25	4.71±0.33	4.73±0.47	4.89±0.66
		CNH M	5.21±0.44	5.03±0.49	5.17±0.33	5.19±0.47	5.15±0.44
		CNH F	4.77±0.44	4.87±0.24	5.24±1.09	4.83±0.36	4.93±0.66
	Data are means ± SD. Greenhouse-Geisser univariate p-levels are presented for each variable. p<0.05 is considered significant. PLA = placebo (0 g), CNL = creatine nitrate low dose (3 g), CNH = creatine nitrate high dose (6 g), and T x T x G represents time x treatment x group interaction. Statistical notations. (*) denotes a significant difference from baseline.

## Sheet: Supplement Table 9
	Table S9: Assessment of blood chemistry changes from baseline to day 6
				PLA		CNL		CNH
				N	%	N	%	N	%	Chi-Square
	Lipids & Glucose	Total-C	Normal/Normal	25	0.89	25	0.89	25	0.89	0.96
			Normal/High	0	0	1	0.04	1	0.04
			High/High	2	0.07	1	0.04	1	0.04
			High/Normal	1	0.04	1	0.04	1	0.04
		HDL-C	Normal/Normal	23	0.82	24	0.86	22	0.79	0.58
			Normal/High	3	0.11	2	0.07	4	0.14
			High/High	1	0.04	0	0	2	0.07
			High/Normal	1	0.04	2	0.07	0	0
		LDL-C	Normal/Normal	19	0.68	15	0.54	22	0.79	0.32
			Normal/High	3	0.11	3	0.11	3	0.11
			High/High	1	0.04	2	0.07	2	0.07
			High/Normal	5	0.18	8	0.29	1	0.04
		Triglyceride	Normal/Normal	28	1	28	1	28	1	-
			Normal/High	0	0	0	0	0	0
			High/High	0	0	0	0	0	0
			High/Normal	0	0	0	0	0	0
		Glucose	Normal/Normal	27	0.96	25	0.89	25	0.93	0.46
			Normal/High	0	0	0	0	1	0.04
			High/High	0	0	0	0	0	0
			High/Normal	1	0.04	3	0.11	1	0.04
	Liver	ALP	Normal/Normal	20	0.71	17	0.61	19	0.68	0.78
			Normal/High	3	0.11	2	0.07	3	0.11
			High/High	5	0.18	8	0.29	6	0.21
			High/Normal	0	0	1	0.04	0	0
		ALT	Normal/Normal	24	0.86	25	0.89	27	0.96	0.52
			Normal/High	1	0.04	2	0.07	0	0
			High/High	1	0.04	0	0	1	0.04
			High/Normal	2	0.07	1	0.04	0	0
		AST	Normal/Normal	20	0.71	18	0.64	25	0.89	0.24
			Normal/High	3	0.11	3	0.11	2	0.07
			High/High	1	0.04	0	0	0	0
			High/Normal	4	0.14	7	0.25	1	0.04
	Muscle	CK	Normal/Normal	11	0.39	10	0.36	11	0.39	0.89
			Normal/High	6	0.21	6	0.21	3	0.11
			High/High	8	0.29	7	0.25	10	0.36
			High/Normal	3	0.11	5	0.18	4	0.14
		LDH	Normal/Normal	12	0.43	12	0.43	13	0.46	0.31
			Normal/High	7	0.25	1	0.04	3	0.11
			High/High	7	0.25	10	0.36	9	0.32
			High/Normal	2	0.07	5	0.18	3	0.11
	Kidney	BUN	Normal/Normal	23	0.82	25	0.89	24	0.86	0.31
			Normal/High	1	0.04	3	0.11	2	0.07
			High/High	2	0.07	0	0	0	0
			High/Normal	2	0.07	0	0	2	0.07
		Creatinine	Normal/Normal	25	0.89	25	0.89	27	0.96	0.23
			Normal/High	2	0.07	0	0	1	0.04
			High/High	0	0	0	0	0	0
			High/Normal	1	0.04	3	0.11	0	0
	Data are presented as frequency. Statistical significance is detailed from chi-squared analysis. PLA = placebo (0 g), CNL = creatine nitrate low dose (3 g), CNH = creatine nitrate high dose (6 g), C = cholesterol, HDL = high density lipoproteins, and LDL = low density lipoproteins, ALP = alkaline phosphatase, ALT = alanine aminotransferase, AST = aspartate aminotransferases, CK = creatine kinase,…

## Sheet: Supplement Table 10
	Table S10: Frequency of Side Effects
				Rating of Symptom
	Symptom	Day	Treatment	0	1	2	3	4	5	Chi-Square
	Dizziness	0 Pre	PLA	28	0	0	0	0	0	-
	Frequency	Testing	CNL	28	0	0	0	0	0
			CNH	28	0	0	0	0	0
		0 Post	PLA	22	5	1	0	0	0	0.96
		Testing	CNL	20	6	1	1	0	0
			CNH	19	7	1	1	0	0
		1 Pre	PLA	27	0	1	0	0	0	0.56
		Testing	CNL	27	1	0	0	0	0
			CNH	27	1	0	0	0	0
		1 Post	PLA	25	3	0	0	0	0	0.35
		Testing	CNL	24	1	3	0	0	0
			CNH	23	3	1	0	1	0
		5 Pre	PLA	28	0	0	0	0	0	0.6
		Testing	CNL	27	1	0	0	0	0
			CNH	27	1	0	0	0	0
		5 Post	PLA	25	1	2	0	0	0	0.83
		Testing	CNL	22	3	3	0	0	0
			CNH	24	2	2	0	0	0
		6 Pre	PLA	26	1	0	1	0	0	0.32
		Testing	CNL	26	0	2	0	0	0
			CNH	27	1	0	0	0	0
		6 Post	PLA	24	3	0	1	0	0	0.84
		Testing	CNL	23	2	2	1	0	0
			CNH	22	4	1	1	0	0
	Headache	0 Pre	PLA	26	1	1	0	0	0	0.33
	Frequency	Testing	CNL	27	0	1	0	0	0
			CNH	25	3	0	0	0	0
		0 Post	PLA	16	7	2	2	0	1	0.99
		Testing	CNL	16	7	2	1	1	1
			CNH	15	6	4	1	1	1
		1 Pre	PLA	26	1	1	0	0	0	0.55
		Testing	CNL	26	0	2	0	0	0
			CNH	27	1	0	0	0	0
		1 Post	PLA	16	5	2	2	2	1	0.83
		Testing	CNL	18	4	3	2	0	1
			CNH	18	5	2	3	0	0
		5 Pre	PLA	25	3	0	0	0	0	0.23
		Testing	CNL	27	0	1	0	0	0
			CNH	27	1	0	0	0	0
		5 Post	PLA	18	5	2	2	0	1	0.65
		Testing	CNL	19	4	3	1	0	1
			CNH	17	6	3	0	2	0
		6 Pre	PLA	25	2	1	0	0	0	0.55
		Testing	CNL	27	0	1	0	0	0
			CNH	26	2	0	0	0	0
		6 Post	PLA	17	5	2	2	1	1	0.99
		Testing	CNL	18	5	2	2	0	1
			CNH	16	5	2	3	1	1
	Tachycardia	0 Pre	PLA	27	1	0	0	0	0	0.12
	Frequency	Testing	CNL	27	0	1	0	0	0
			CNH	24	4	0	0	0	0
		0 Post	PLA	16	8	4	0	0	0	0.58
		Testing	CNL	17	6	4	1	0	0
			CNH	14	11	2	0	1	0
		1 Pre	PLA	25	3	0	0	0	0	0.3
		Testing	CNL	27	0	1	0	0	0
			CNH	26	2	0	0	0	0
		1 Post	PLA	14	9	3	2	0	0	0.67
		Testing	CNL	19	4	3	2	0	0
			CNH	15	9	2	1	0	1
		5 Pre	PLA	25	3	0	0	0	0	0.55
		Testing	CNL	26	1	1	0	0	0
			CNH	26	2	0	0	0	0
		5 Post	PLA	17	7	3	1	0	0	0.87
		Testing	CNL	18	5	4	1	0	0
			CNH	16	9	3	0	0	0
		6 Pre	PLA	25	2	1	0	0	0	0.4
		Testing	CNL	26	0	2	0	0	0
			CNH	27	1	0	0	0	0
		6 Post	PLA	14	8	3	2	1	0	0.73
		Testing	CNL	18	4	3	3	0	0
			CNH	17	7	1	3	0	0
	Heart	0 Pre	PLA	28	0	0	0	0	0	0.36
	Palpitations	Testing	CNL	28	0	0	0	0	0
	Frequency		CNH	28	0	0	0	0	0
		0 Post	PLA	27	1	0	0	0	0	1
		Testing	CNL	27	1	0	0	0	0
			CNH	27	1	0	0	0	0
		1 Pre	PLA	28	0	0	0	0	0	-
		Testing	CNL	28	0	0	0	0	0
			CNH	28	0	0	0	0	0
		1 Post	PLA	27	1	0	0	0	0	1
		Testing	CNL	27	1	0	0	0	0
			CNH	27	1	0	0	0	0
		5 Pre	PLA	28	0	0	0	0	0	-
		Testing	CNL	28	0	0	0	0	0
			CNH	28	0	0	0	0	0
		5 Post	PLA	26	2	0	0	0	0	0.81
		Testing	CNL	27	1	0	0	0	0
			CNH	26	2	0	0	0	0
		6 Pre	PLA	28	0	0	0	0	0	-
		Testing	CNL	28	0	0	0	0	0
			CNH	28	0	0	0	0	0
		6 Post	PLA	27	1	0	0	0	0	0.56
		Testing	CNL	27	0	1	0	0	0
			CNH	27	1	0	0	0	0
	Dyspnea	0 Pre	PLA	28	0	0	0	0	0	0.36
	Frequency	Testing	CNL	27	1	0	0	0	0
			CNH	28	0	0	0	0	0
		0 Post	PLA	23	3	2	0	0	0	0.88
		Testing	CNL	19	5	3	1	0	0
			CNH	19	5	3	1	0	0
		1 Pre	PLA	27	0	1	0	0	0	0.4
		Testing	CNL	27	1	0	0	0	0
			CNH	26	2	0	0	0	0
		1 Post	PLA	24	4	0	0	0	0	0.38
		Testing	CNL	23	2	3	0	0	0
			CNH	22	4	1	1	0	0
		5 Pre	PLA	27	1	0	0	0	0	0.64
		Testing	CNL	26	2	0	0	0	0
			CNH	26	1	1	0	0	0
		5 Post	PLA	24	2	1	1	0	0	0.87
		Testing	CNL	21	3	3	1	0	0
			CNH	23	3	2	0	0	0
		6 Pre	PLA	26	1	0	1	0	0	0.37
		Testing	CNL	25	1	2	0	0	0
			CNH	26	2	0	0	0	0
		6 Post	PLA	23	4	0	1	0	0	0.41
		Testing	CNL	22	1	4	1	0	0
			CNH	21	2	4	1	0	0
	Symptom	Day	Treatment	0	1	2	3	4	5	Chi-Square
	Nervousness	0 Pre	PLA	26	2	0	0	0	0	0.34
	Frequency	Testing	CNL	27	1	0	0	0	0
			CNH	24	4	0	0	0	0
		0 Post	PLA	17	5	3	2	0	1	0.98
		Testing	CNL	15	4	3	5	0	1
			CNH	14	6	3	4	0	1
		1 Pre	PLA	26	1	1	0	0	0	0.91
		Testing	CNL	26	1	1	0	0	0
			CNH	27	1	0	0	0	0
		1 Post	PLA	16	4	3	2	2	1	0.83
		Testing	CNL	17	3	2	5	0	1
			CNH	17	5	3	2	1	0
		5 Pre	PLA	24	4	0	0	0	0	0.2
		Testing	CNL	27	1	0	0	0	0
			CNH	27	1	0	0	0	0
		5 Post	PLA	18	4	3	1	1	1	0.93
		Testing	CNL	17	5	2	3	0	1
			CNH	16	7	2	2	1	0
		6 Pre	PLA	26	1	1	0	0	0	0.66
		Testing	CNL	26	2	0	0	0	0
			CNH	26	2	0	0	0	0
		6 Post	PLA	17	3	3	2	2	1	0.64
		Testing	CNL	16	6	3	2	0	1
			CNH	16	3	1	6	1	1
	Blurred	0 Pre	PLA	27	1	0	0	0	0	0.12
	Vision	Testing	CNL	27	0	1	0	0	0
	Frequency		CNH	24	4	0	0	0	0
		0 Post	PLA	17	6	5	0	0	0	0.31
		Testing	CNL	17	2	6	2	1	0
			CNH	13	9	4	2	0	0
		1 Pre	PLA	25	3	0	0	0	0	0.3
		Testing	CNL	27	0	1	0	0	0
			CNH	26	2	0	0	0	0
		1 Post	PLA	15	5	5	2	1	0	0.59
		Testing	CNL	19	3	2	3	1	0
			CNH	15	8	3	1	0	1
		5 Pre	PLA	25	3	0	0	0	0	0.55
		Testing	CNL	26	1	1	0	0	0
			CNH	26	2	0	0	0	0
		5 Post	PLA	18	4	5	1	0	0	0.89
		Testing	CNL	17	5	4	1	1	0
			CNH	17	6	5	0	0	0
		6 Pre	PLA	25	3	0	0	0	0	0.27
		Testing	CNL	26	0	1	1	0	0
			CNH	27	1	0	0	0	0
		6 Post	PLA	15	5	3	3	2	0	0.95
		Testing	CNL	18	3	4	1	2	0
			CNH	17	3	4	3	1	0
	Other	0 Pre	PLA	28	0	0	0	0	0	-
	Frequency	Testing	CNL	28	0	0	0	0	0
			CNH	28	0	0	0	0	0
		0 Post	PLA	28	0	0	0	0	0	-
		Testing	CNL	28	0	0	0	0	0
			CNH	28	0	0	0	0	0
		1 Pre	PLA	28	0	0	0	0	0	-
		Testing	CNL	28	0	0	0	0	0
			CNH	28	0	0	0	0	0
		1 Post	PLA	28	0	0	0	0	0	-
		Testing	CNL	28	0	0	0	0	0
			CNH	28	0	0	0	0	0
		5 Pre	PLA	27	1	0	0	0	0	0.36
		Testing	CNL	28	0	0	0	0	0
			CNH	28	0	0	0	0	0
		5 Post	PLA	27	1	0	0	0	0	0.6
		Testing	CNL	28	0	0	0	0	0
			CNH	27	1	0	0	0	0
		6 Pre	PLA	27	1	0	0	0	0	0.36
		Testing	CNL	28	0	0	0	0	0
			CNH	28	0	0	0	0	0
		6 Post	PLA	28	0	0	0	0	0	-
		Testing	CNL	28	0	0	0	0	0
			CNH	28	0	0	0	0	0
	Data are presented as frequency. Statistical significance is detailed from chi-squared analysis. p < 0.05 considered significant. PLA = placebo (0 g), CNL = creatine nitrate low dose (3 g), and CNH = creatine nitrate high dose (6 g).

[truncated: 2 more sheets: Supplement Table 11, Supplement Table 12)]
